# Supplementary material for: Prediction and Validation of Mouse Meiosis-Essential Genes Based on Spermatogenesis Proteome Dynamics
Source: PubMed Central journal article supplement — Mol Cell Proteomics. 2021 Jan 6;20:100014. doi: 10.1074/mcp.RA120.002081 (PMC7950215; doi:10.1074/mcp.ra120.002081), 2021-01-06
Supplement: mmc7.pdf [file mmc7.pdf]

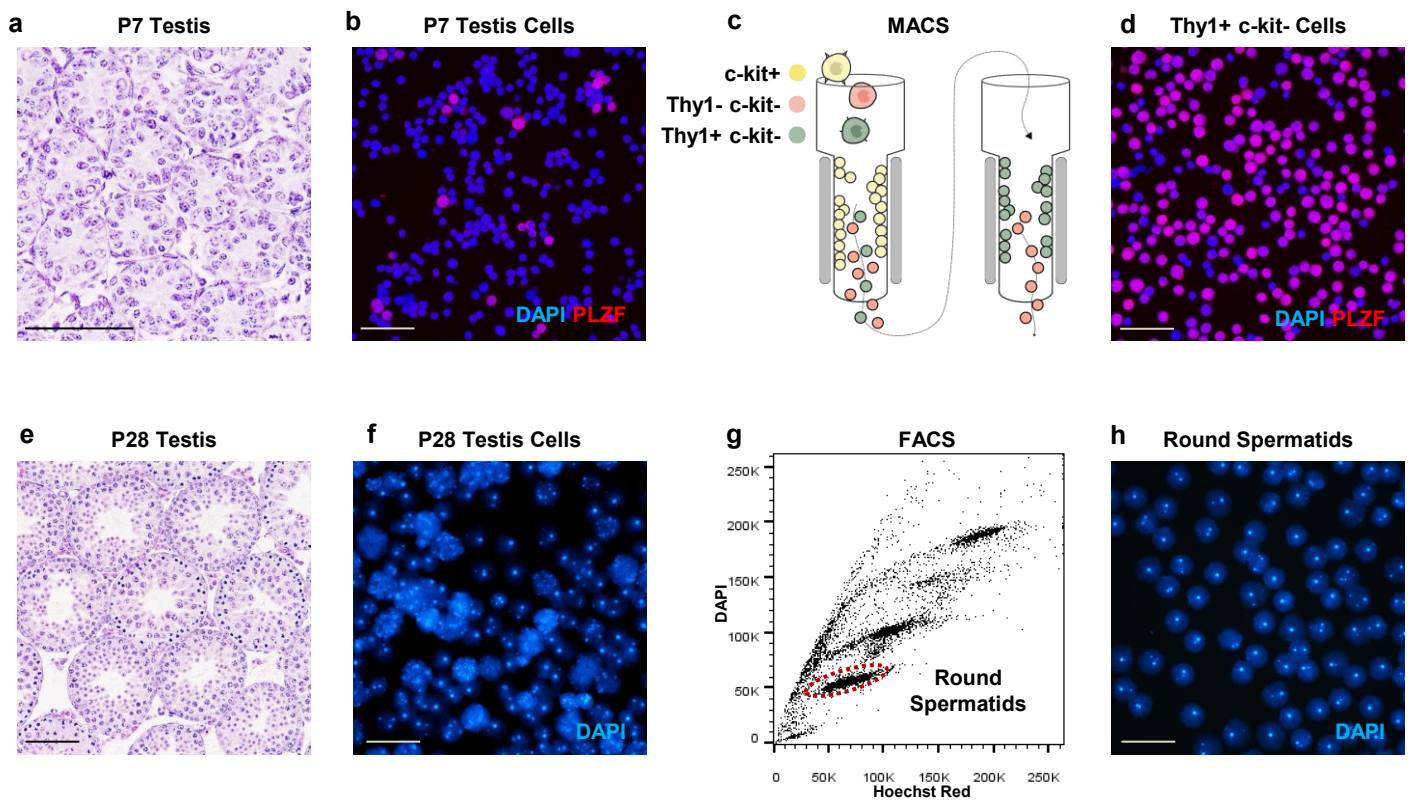

**Fig. S1 Isolation of undifferentiated spermatogonia (Aundiff) and round spermatids (RS).**

**a** Cross section of H&E stained testes from P7 mouse. **b** DAPI (blue) and anti-PLZF (red) immuno-staining of digested P7 testes cells before MACS purification. **c** Illustration of magnetic activated cell sorting (MACS) strategy to isolate THY1+ c-KIT- Aundiff cells. Differentiated spermatogonia and other testis somatic cells expressed c-KIT (cKIT+ cells, shown as yellow cells), which were depleted first by binding to the anti-c-KIT antibody and magnetic columns. The unbound c-KIT- cells were subsequently separated by MACS to enrich the THY1+ c-KIT- cells (showed as green cells). **d** DAPI (blue) and anti-PLZF (red) immuno-staining of THY1+ c-KIT- cells after MACS purification. **e** Cross section of H&E stained testes of P28 mouse. **f** DAPI staining of digested P28 testis cells before FACS purification. **g** FACS plot of digested testes cells stained with Hoechst 33,342. Gate for sorting haploid RS is circled. **h** DAPI staining of RS after FACS purification. All scale bars = 50  $\mu\text{m}$ .

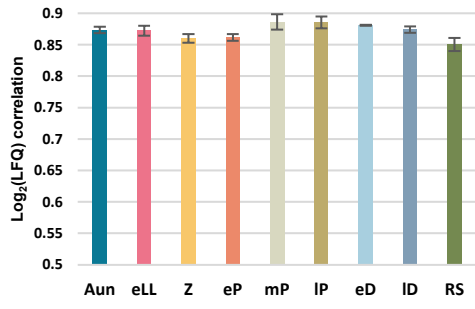

**Fig. S2** The Pearson correlations coefficients of the proteomes between the triplicate techniques.

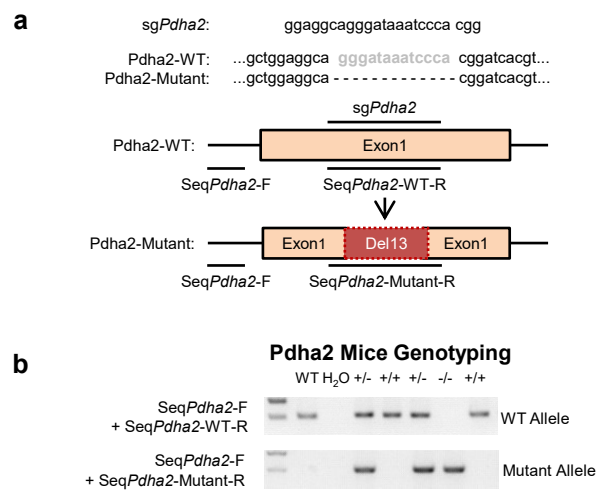

**Fig. S3 Construction and genotyping of Pdha2 knockout mice.**

**a** The strategy to construct Pdha2 knockout mice.

**b** Genotyping of Pdha2 knockout mice verified by PCR.

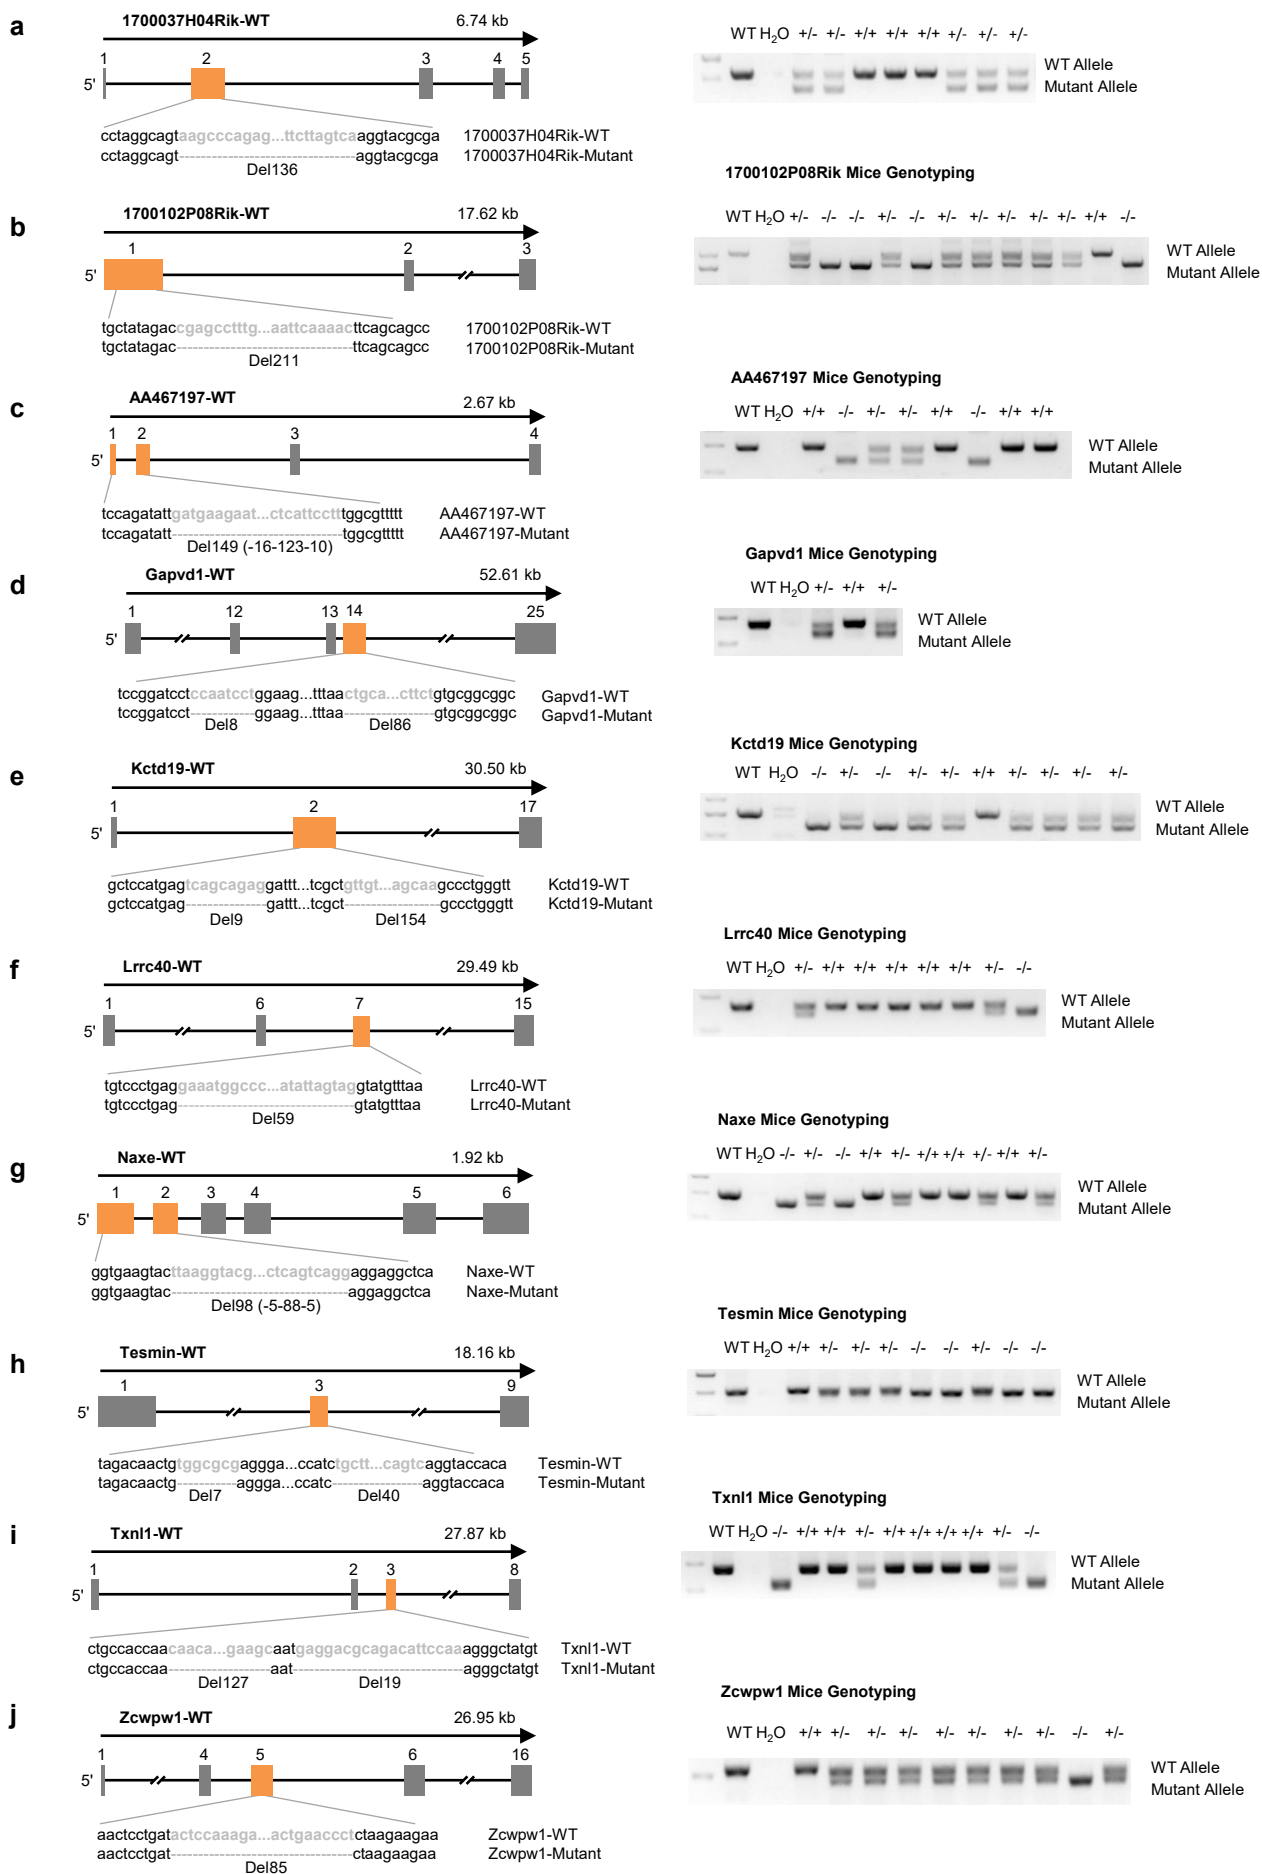

**Fig. S4 Construction and genotyping of ten knock out mice of the top ten RBF-ranked candidates.**  
**a-j** Strategy to construct knockout mice of the top 10 RBF-ranked candidates (left panel) and the genotyping of knockout mice verified by PCR (right panel).

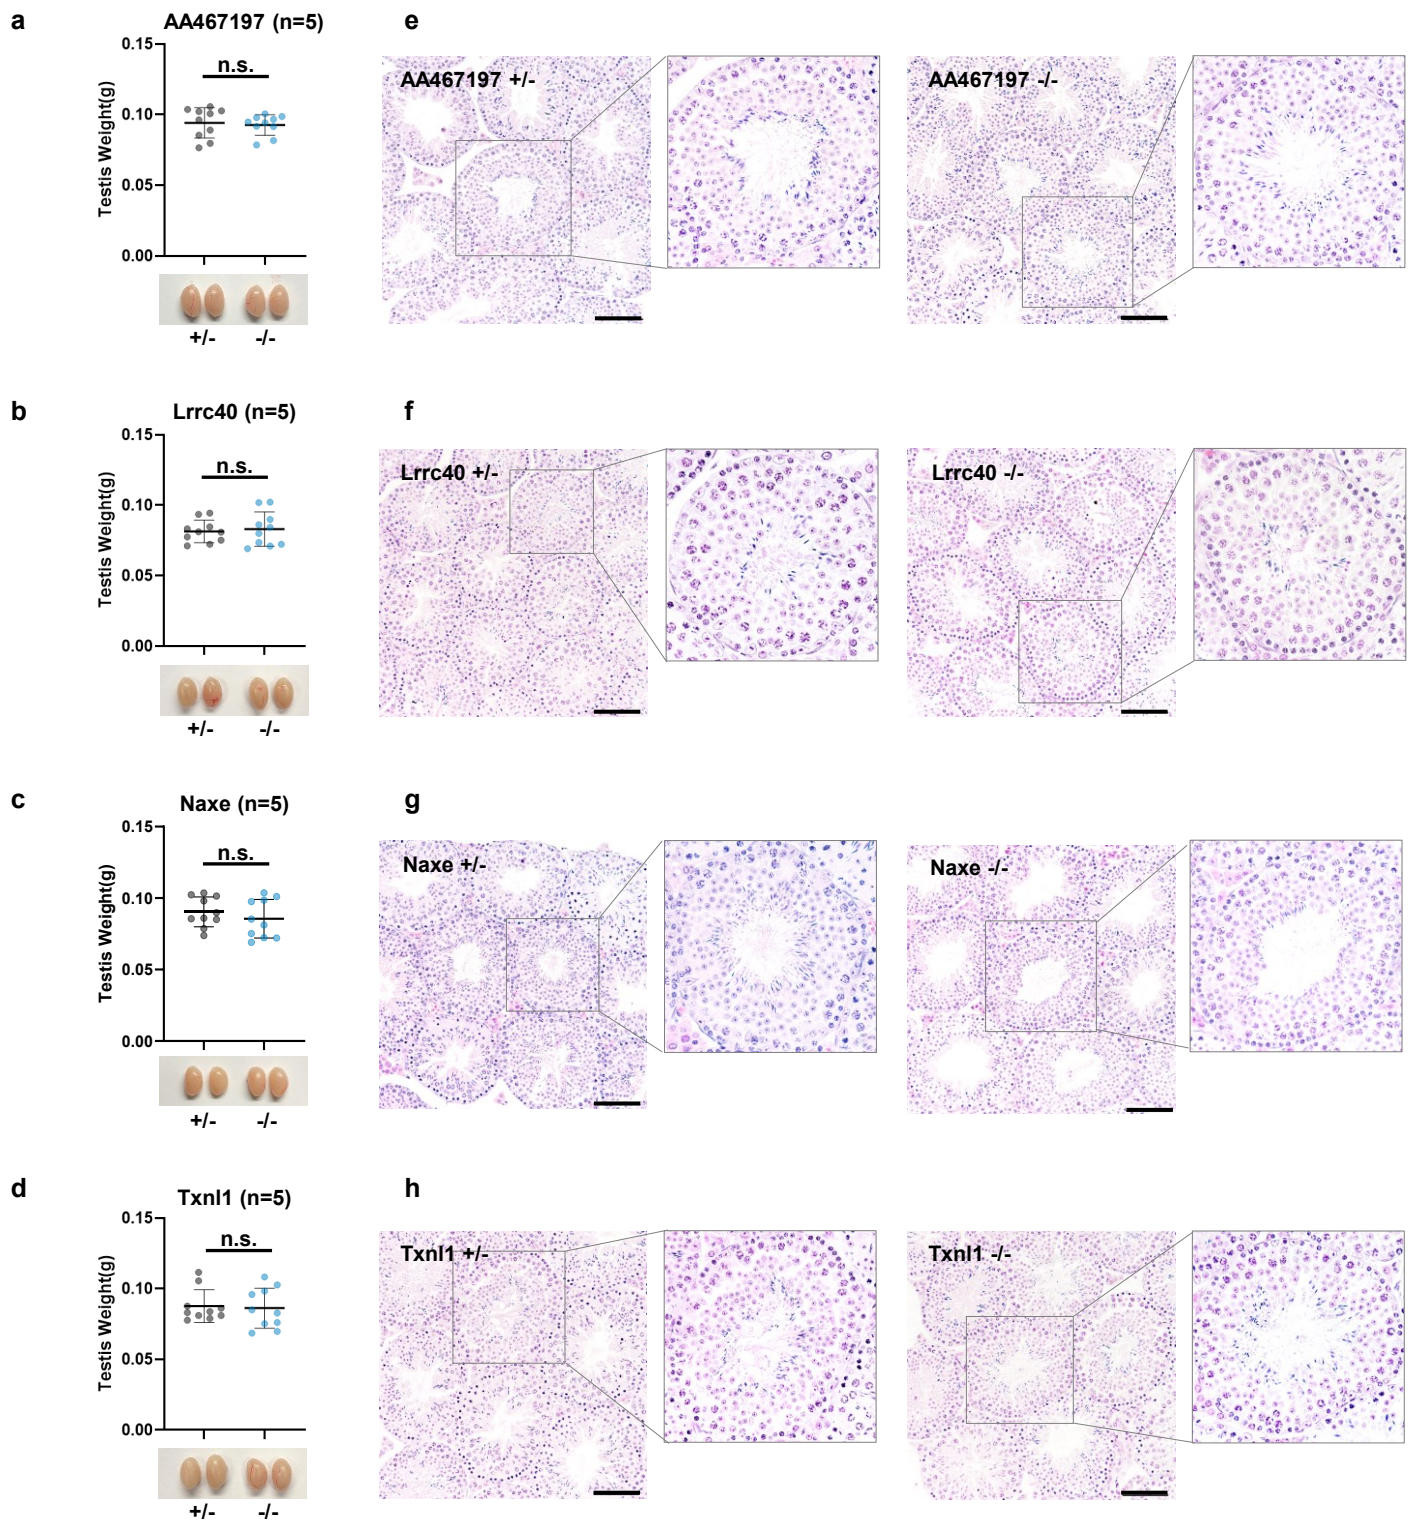

**Fig. S5 Phenotypic validation of the meiosis non-essential proteins predicted by RBF.**

**a-d** Comparison of testis weights derived from 8-week-old Txnl1<sup>+/-</sup> and Txnl1<sup>-/-</sup> mice (**a**), AA467197<sup>+/-</sup> and AA467197<sup>-/-</sup> mice (**b**), Lrrc40<sup>+/-</sup> and Lrrc40<sup>-/-</sup> mice (**c**), and Naxe<sup>+/-</sup> and Naxe<sup>-/-</sup> mice (**d**). n.s. means no significance in unpaired two-tailed t-test. **e-h** Cross-sections of H&E stained seminiferous tubules from the heterozygous and homozygous knockout mice of the four genes above, insets denote the specific seminiferous tubule under higher magnification. All scale bars = 50  $\mu$ m.
